# Supplementary material
Source: PubMed Central journal article supplement (PMC2930460)
Supplement: 1009412107_pnas.201009412SI.pdf [file 1009412107_pnas.201009412SI.pdf]

# Supporting Information

Forsberg et al. 10.1073/pnas.1009412107

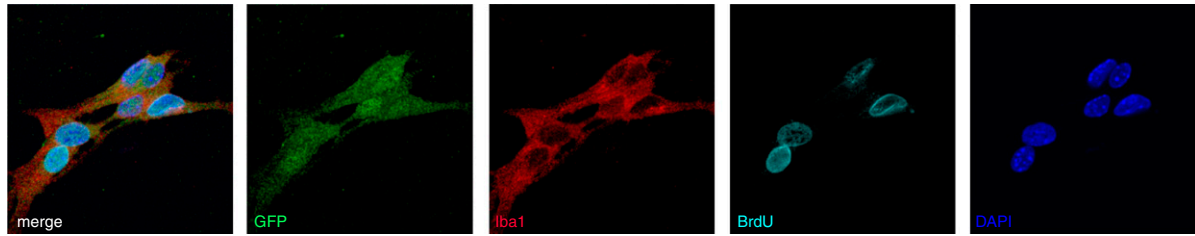

**Fig. S1.** Proliferation of reprogrammed cells. Neural stem cell–derived lenti-PU.1-GFP–transduced cells positive for the monocyte marker Iba1 incorporate the S-phase marker BrdU present in the culture medium at 12 h before analysis. Cell nuclei are visualized with DAPI.

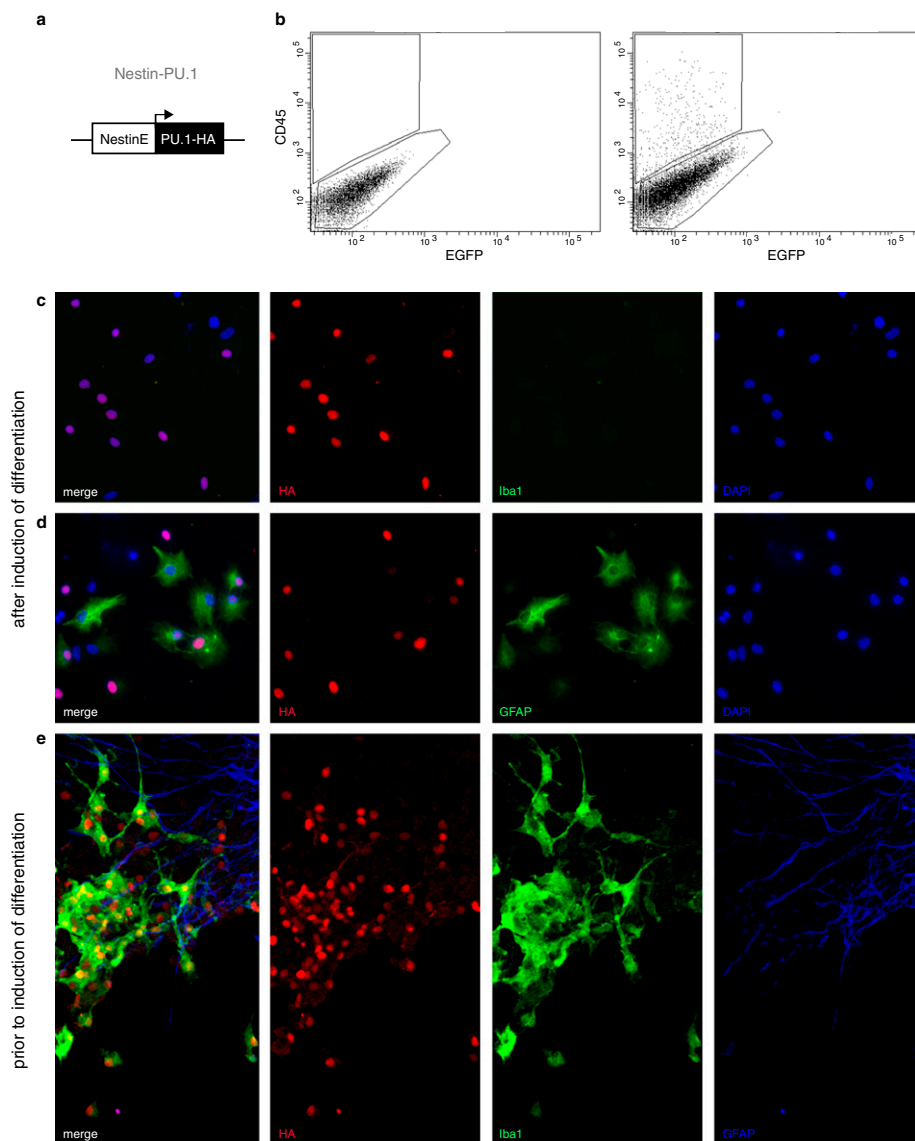

**Fig. S2.** Reprogramming of neural stem/progenitor cells. (A) Schematic depiction of the nestin-PU.1 expression plasmid. (B) No CD45<sup>+</sup> expression was found in neural stem cell–derived cells transfected with the control vector (*Left*), but transfection with the nestin-PU.1 plasmid resulted in CD45<sup>+</sup> expression (*Right*). (C and D) Transduction of neural stem cell–derived cells with lenti-PU.1-GFP after induction of differentiation failed to induce monocyte reprogramming and Iba1 expression. The majority of cells differentiate to GFAP<sup>+</sup> astrocytes. (E) Transduction of neural stem cell–derived cells with lenti-PU.1-GFP before differentiation results in efficient reprogramming to Iba1<sup>+</sup> monocytes.
